# Supplementary material for: Discovery of Serotransferrin Glycoforms: Novel Markers for Diagnosis of Liver Periductal Fibrosis and Prediction of Cholangiocarcinoma
Source: Biomolecules. 2019 Sep 27;9(10):538. doi: 10.3390/biom9100538 (PMC6843847; doi:10.3390/biom9100538)
Supplement: Supplementary file 1 [file biomolecules-09-00538-s001.pdf]

# Supplementary Tables and Figures

**Table 1.** Dynamic multiple reaction mode (MRM) transitions used to monitor glycopeptides.

| Glycosite              | Glycofom   |         | Precursor ion (m/z) | Product ion (m/z) | Collision energy (eV) | Retention time (min) |
|------------------------|------------|---------|---------------------|-------------------|-----------------------|----------------------|
|                        | #Component | *Number |                     |                   |                       |                      |
| Asn <sup>21-433</sup>  | H4N3       | 4300    | 912.1               | 204.0             | 14                    | 6.6                  |
|                        | H4N3S1     | 4301    | 1009.1              | 204.0             | 16                    | 6.6                  |
|                        | H4N4S1     | 4401    | 1076.8              | 274.1             | 17                    | 7.8                  |
|                        | H5N4       | 5400    | 1033.8              | 366.1             | 16                    | 6.6                  |
|                        | H5N4S1     | 5401    | 1130.8              | 366.1             | 18                    | 6.4                  |
|                        | H5N4S2     | 5402    | 1227.8              | 366.1             | 20                    | 6.6                  |
|                        | H5N4F1     | 5410    | 1082.5              | 366.1             | 17                    | 6.6                  |
|                        | H5N4F1S1   | 5411    | 1179.5              | 274.1             | 19                    | 7.6                  |
|                        | H5N4F1S2   | 5412    | 1276.5              | 366.1             | 21                    | 6.6                  |
|                        | H5N4F2     | 5420    | 1131.2              | 366.1             | 18                    | 6.4                  |
|                        | H5N4F2S1   | 5421    | 1228.2              | 274.1             | 20                    | 6.6                  |
|                        | H5N4F2S2   | 5422    | 994.2               | 366.1             | 16                    | 6.6                  |
|                        | H6N5S1     | 6501    | 1252.5              | 366.1             | 20                    | 6.3                  |
|                        | H6N5S2     | 6502    | 1012.4              | 274.1             | 16                    | 6.5                  |
|                        | H6N5S3     | 6503    | 1085.2              | 274.1             | 17                    | 6.7                  |
|                        | H6N5F1S1   | 6511    | 967.2               | 274.1             | 15                    | 7.7                  |
|                        | H6N5F2     | 6520    | 1252.9              | 366.1             | 20                    | 6.4                  |
|                        | H6N5F2S1   | 6521    | 1012.7              | 366.1             | 16                    | 6.6                  |
|                        | H6N5F2S2   | 6522    | 1085.4              | 274.1             | 17                    | 6.7                  |
| Asn <sup>421-452</sup> | H4N3       | 4300    | 1201.0              | 366.1             | 19                    | 7.6                  |
|                        | H4N3F1     | 4310    | 1273.8              | 366.1             | 21                    | 8.0                  |
|                        | H4N4S1     | 4401    | 1059.9              | 366.1             | 17                    | 8.0                  |
|                        | H5N4       | 5400    | 1292.3              | 366.1             | 21                    | 8.0                  |
|                        | H5N4S1     | 5401    | 1092.3              | 366.1             | 17                    | 8.0                  |
|                        | H5N4S2     | 5402    | 1150.5              | 366.1             | 18                    | 6.6                  |
|                        | H5N4F1     | 5401    | 1063.3              | 366.1             | 17                    | 8.0                  |
|                        | H5N4F1S1   | 5411    | 1121.5              | 366.1             | 18                    | 7.5                  |
|                        | H5N4F1S2   | 5412    | 1179.7              | 274.1             | 19                    | 7.5                  |
|                        | H5N4F2     | 5420    | 1092.5              | 366.1             | 17                    | 8.0                  |
|                        | H5N4F2S1   | 5421    | 1150.7              | 366.1             | 18                    | 6.5                  |
|                        | H5N4F2S2   | 5422    | 1208.9              | 274.1             | 19                    | 7.5                  |
|                        | H6N5S1     | 6501    | 1165.3              | 366.1             | 19                    | 8.0                  |
|                        | H6N5S2     | 6502    | 1223.5              | 274.1             | 20                    | 8.0                  |

| Glycosite              | Glycoform              |                      | Precursor ion (m/z) | Product ion (m/z) | Collision energy (eV) | Retention time (min) |
|------------------------|------------------------|----------------------|---------------------|-------------------|-----------------------|----------------------|
|                        | <sup>#</sup> Component | <sup>\$</sup> Number |                     |                   |                       |                      |
|                        | H6N5S2                 | 6502                 | 1223.5              | 274.1             | 20                    | 8.0                  |
|                        | H6N5S3                 | 6503                 | 1281.7              | 366.1             | 21                    | 8.0                  |
|                        | H6N5F1S1               | 6511                 | 1194.5              | 366.1             | 19                    | 7.5                  |
|                        | H6N5F1S2               | 6512                 | 1252.7              | 366.1             | 20                    | 6.3                  |
|                        | H6N5F2S1               | 6521                 | 1223.7              | 366.1             | 20                    | 8.1                  |
|                        | H6N5F2S2               | 6522                 | 1281.9              | 274.1             | 21                    | 6.7                  |
| Asn <sup>622-642</sup> | H4N3                   | 4300                 | 1258.2              | 366.1             | 20                    | 7.6                  |
|                        | H4N3S1                 | 4301                 | 1016.7              | 274.1             | 16                    | 7.6                  |
|                        | H4N4S1                 | 4401                 | 1067.4              | 366.1             | 17                    | 7.6                  |
|                        | H5N4                   | 5400                 | 1035.2              | 366.1             | 16                    | 7.6                  |
|                        | H5N4S1                 | 5401                 | 1108.0              | 366.1             | 18                    | 7.6                  |
|                        | H5N4S2                 | 5402                 | 1180.7              | 274.1             | 19                    | 7.5                  |
|                        | H5N4F1                 | 5410                 | 1071.7              | 366.1             | 17                    | 7.6                  |
|                        | H5N4F1S1               | 5411                 | 1144.5              | 366.1             | 18                    | 10.4                 |
|                        | H5N4F1S2               | 5412                 | 1217.2              | 274.1             | 20                    | 7.5                  |
|                        | H5N4F2                 | 5420                 | 1108.2              | 366.1             | 18                    | 7.3                  |
|                        | H5N4F2S1               | 5421                 | 1181.0              | 274.1             | 19                    | 7.6                  |
|                        | H5N4F2S2               | 5422                 | 1253.8              | 366.1             | 20                    | 6.6                  |
|                        | H6N5S1                 | 6501                 | 1199.2              | 366.1             | 19                    | 7.6                  |
|                        | H6N5S2                 | 6502                 | 1272.0              | 274.1             | 21                    | 5.9                  |
|                        | H6N5S3                 | 6503                 | 1076.0              | 274.1             | 17                    | 7.8                  |
|                        | H6N5                   | 6500                 | 1126.5              | 366.1             | 18                    | 7.9                  |
|                        | H6N5F1S1               | 6511                 | 1235.8              | 366.1             | 20                    | 6.6                  |
|                        | H6N5F1S3               | 6513                 | 1105.2              | 366.1             | 18                    | 7.9                  |
|                        | Peptide Tf             |                      | 489.8               | 735.4             | 11                    | 4.8                  |

<sup>#</sup> Glycan components are hexose (H), hexNAc (N), fucose (F), and N-acetyl neuraminic acid (S). <sup>\$</sup> The glycan forms are represented in glycan composition numbers of hexose, hexNAc, fucose, and N-acetyl neuraminic acid, respectively.

**Table S2.** Degree of glycosylation (mean  $\pm$  SD) of the altered glycoforms in control, periductal fibrosis (PDF), and cholangiocarcinoma (CCA) subjects.

| <sup>s</sup> Glycoform | Degree of glycosylation (mean $\pm$ SD) |                 |                 |
|------------------------|-----------------------------------------|-----------------|-----------------|
|                        | Control                                 | PDF             | CCA             |
| 6503                   | 3.6 $\pm$ 2.5                           | 5.0 $\pm$ 2.8   | 7.9 $\pm$ 7.3   |
| 5422                   | 2.1 $\pm$ 2.3                           | 1.9 $\pm$ 1.4   | 3.9 $\pm$ 5.0   |
| 6502                   | 3.8 $\pm$ 3.1                           | 5.9 $\pm$ 4.7   | 13.0 $\pm$ 12.5 |
| 6511                   | 0.6 $\pm$ 0.5                           | 0.9 $\pm$ 0.6   | 0.8 $\pm$ 0.7   |
| 6521                   | 1.5 $\pm$ 1.2                           | 1.3 $\pm$ 1.4   | 3.2 $\pm$ 4.0   |
| 5402                   | 0.7 $\pm$ 0.4                           | 0.9 $\pm$ 0.5   | 0.9 $\pm$ 0.6   |
| 5412                   | 0.7 $\pm$ 0.5                           | 0.9 $\pm$ 0.5   | 1.2 $\pm$ 0.9   |
| 5421                   | 0.7 $\pm$ 0.4                           | 0.9 $\pm$ 0.6   | 0.9 $\pm$ 0.6   |
| 6501                   | 17.6 $\pm$ 14.0                         | 26.2 $\pm$ 13.3 | 42.4 $\pm$ 28.3 |

<sup>s</sup> The glycan forms are represented in glycan composition numbers of hexose, hexNAc, fucose, and N-acetyl neuraminic acid, respectively.

**Table 3.** Association between levels of serotransferrin peptides and glycopeptides in the sera of CCA patients and clinicopathological data.

| Peptide and glycoforms  | Level (n) | Age |       | Gender |        | Histological grading |         | Metastasis stage |          | *CCA stage |   |    |    |       |
|-------------------------|-----------|-----|-------|--------|--------|----------------------|---------|------------------|----------|------------|---|----|----|-------|
|                         |           | <56 | ≥56   | Male   | Female | Papillary            | Tubular | Negative         | Positive | 0          | 1 | 2  | 3  | 4     |
| Serotransferrin peptide | Low (91)  | 38  | 53    | 42     | 49     | 49                   | 42      | 47               | 44       | 4          | 6 | 16 | 21 | 31    |
|                         | High (9)  | 3   | 6     | 4      | 5      | 6                    | 3       | 5                | 4        | 2          | 0 | 0  | 2  | 3     |
|                         | P-value   |     | 0.733 |        | 1.000  |                      | 0.505   |                  | 1.000    |            |   |    |    | 0.136 |
| 6503                    | Low (29)  | 14  | 15    | 13     | 16     | 17                   | 12      | 14               | 15       | 4          | 2 | 4  | 8  | 10    |
|                         | High (71) | 27  | 44    | 33     | 38     | 38                   | 33      | 38               | 33       | 2          | 4 | 12 | 15 | 24    |
|                         | P-value   |     | 0.377 |        | 1.000  |                      | 0.665   |                  | 0.665    |            |   |    |    | 0.438 |
| 5422                    | Low (44)  | 18  | 26    | 24     | 20     | 28                   | 16      | 25               | 19       | 3          | 4 | 9  | 9  | 15    |
|                         | High (56) | 23  | 33    | 22     | 34     | 27                   | 29      | 27               | 29       | 3          | 2 | 7  | 14 | 19    |
|                         | P-value   |     | 1.000 |        | 0.159  |                      | 0.157   |                  | 0.426    |            |   |    |    | 0.701 |
| 6502                    | Low (26)  | 12  | 14    | 11     | 15     | 14                   | 12      | 15               | 11       | 2          | 2 | 5  | 8  | 6     |
|                         | High (74) | 29  | 45    | 35     | 39     | 41                   | 33      | 37               | 37       | 4          | 4 | 11 | 15 | 28    |
|                         | P-value   |     | 0.644 |        | 0.819  |                      | 1.000   |                  | 0.649    |            |   |    |    | 0.626 |
| 6511                    | Low (38)  | 18  | 20    | 19     | 19     | 21                   | 17      | 18               | 20       | 1          | 2 | 6  | 7  | 20    |
|                         | High (62) | 23  | 39    | 27     | 35     | 34                   | 28      | 34               | 28       | 5          | 4 | 10 | 16 | 14    |
|                         | P-value   |     | 0.403 |        | 0.543  |                      | 1.000   |                  | 0.538    |            |   |    |    | 0.131 |
| 6521                    | Low (45)  | 21  | 24    | 17     | 28     | 21                   | 24      | 21               | 24       | 3          | 2 | 6  | 12 | 11    |
|                         | High (55) | 20  | 35    | 29     | 26     | 34                   | 21      | 31               | 24       | 3          | 4 | 10 | 11 | 23    |
|                         | P-value   |     | 0.315 |        | 0.161  |                      | 0.159   |                  | 0.422    |            |   |    |    | 0.618 |
| 5402                    | Low (45)  | 21  | 24    | 21     | 24     | 23                   | 22      | 24               | 21       | 2          | 2 | 9  | 11 | 17    |
|                         | High (55) | 20  | 35    | 25     | 30     | 32                   | 23      | 38               | 27       | 4          | 4 | 7  | 12 | 17    |
|                         | P-value   |     | 0.315 |        | 0.074  |                      | 0.547   |                  | 0.843    |            |   |    |    | 0.823 |
| 5412                    | Low (22)  | 12  | 10    | 10     | 12     | 12                   | 10      | 11               | 11       | 2          | 0 | 3  | 6  | 9     |
|                         | High (78) | 29  | 49    | 36     | 42     | 43                   | 35      | 41               | 37       | 4          | 6 | 13 | 17 | 25    |
|                         | P-value   |     | 0.219 |        | 0.068  |                      | 1.000   |                  | 1.000    |            |   |    |    | 0.624 |
| 5421                    | Low (42)  | 20  | 22    | 21     | 21     | 22                   | 20      | 23               | 19       | 2          | 2 | 8  | 11 | 14    |
|                         | High (58) | 21  | 37    | 25     | 33     | 33                   | 25      | 29               | 29       | 4          | 4 | 8  | 12 | 20    |
|                         | P-value   |     | 0.305 |        | 0.546  |                      | 0.688   |                  | 0.688    |            |   |    |    | 0.905 |
| 6501                    | Low (16)  | 4   | 12    | 8      | 8      | 9                    | 7       | 6                | 10       | 2          | 0 | 4  | 0  | 10    |
|                         | High (84) | 37  | 47    | 38     | 46     | 46                   | 38      | 46               | 38       | 4          | 6 | 12 | 23 | 24    |
|                         | P-value   |     | 0.178 |        | 0.789  |                      | 1.000   |                  | 0.277    |            |   |    |    | 0.034 |

\*The mean values of glycan levels in control subjects were used as the cut-off between high and low glycan levels. \*85 cases of CCA had complete staging data.

**Table 4.** Association between levels of 6503, 6502, and 6501 serotransferrin glycopeptides in the sera of CCA patients and clinicopathological data.

| Glycoforms       | CCA group (n)            | Age   |     | Gender |        | Histological grading |         | Metastasis stage |          | #CCA stage |   |    |    |    |
|------------------|--------------------------|-------|-----|--------|--------|----------------------|---------|------------------|----------|------------|---|----|----|----|
|                  |                          | <56   | ≥56 | Male   | Female | Papillary            | Tubular | Negative         | Positive | 0          | 1 | 2  | 3  | 4  |
| 6503, 6502, 6501 | *High >2 glycoforms (86) | 37    | 49  | 40     | 46     | 46                   | 40      | 44               | 42       | 3          | 5 | 13 | 22 | 28 |
|                  | §Other (14)              | 4     | 10  | 6      | 8      | 9                    | 5       | 8                | 6        | 3          | 1 | 3  | 1  | 6  |
|                  | P-value                  | 0.388 |     | 1.000  |        | 0.567                |         | 0.777            |          | 0.114      |   |    |    |    |

\*CCA patients with high expression of 2 or more of the 3 glycoforms (n = 86). §CCA patients with high expression of 1 or none of the 3 glycoforms (n = 14). #85 cases of CCA had complete staging data.

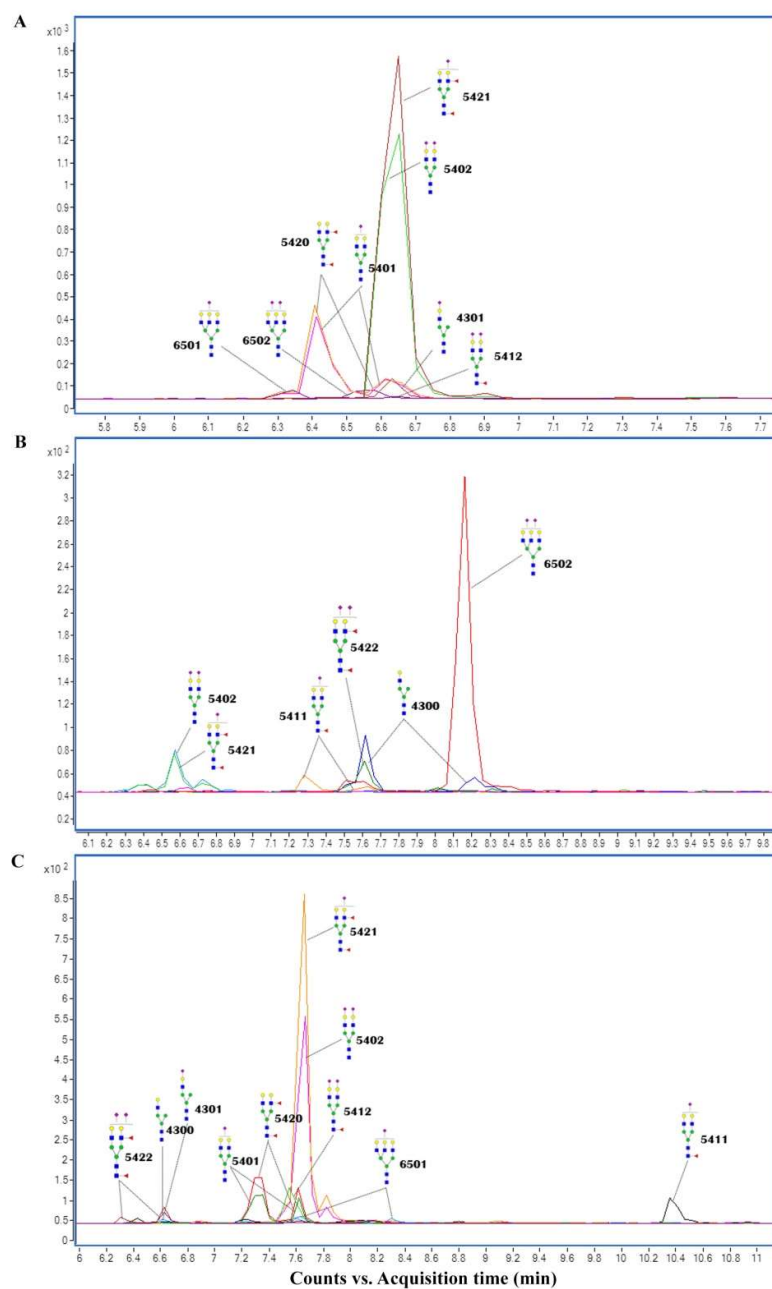

**Figure 1.** Total MRM chromatogram of standard serotransferrin and its glycopeptides. Chromatograms of glycopeptides in a tryptic digest of standard serotransferrin at (A) Asn<sup>432</sup> (CGLVPVLAENYNK), (B) Asn<sup>432</sup> (CGLVPVLAENYNKSDNCEDTPEAGYFAIAVVK), and (C) Asn<sup>630</sup> (QQQHLFGSNVTDCSGNFCLFR).

### 6503 glycoform

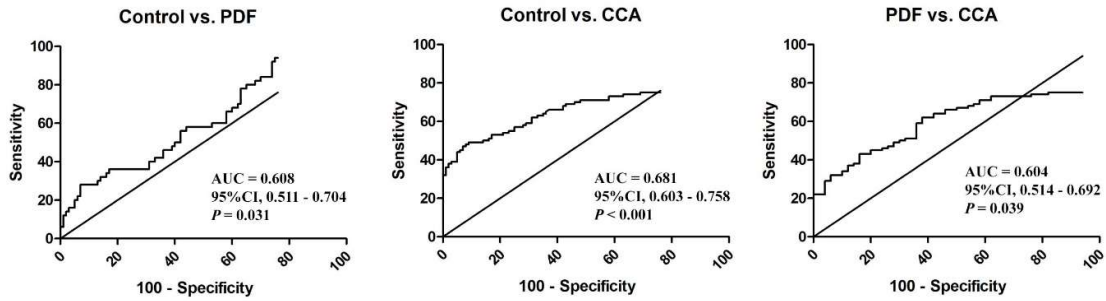

**Figure S2.** Receiver operating characteristic (ROC) curve analysis of the Hex6HexNAc5NeuAc3 (6503) glycoform in the sera of control ( $n = 100$ ), PDF ( $n = 50$ ), and CCA ( $n = 100$ ) subjects. The ROC curves of the 6503 glycoform of subjects with PDF and CCA compared with the control group are represented in (A) and (B), respectively. ROC curves of patients with PDF and CCA (C) are constructed. Area under the ROC curve (AUC) and statistic comparisons are indicated.

### 5422 glycoform

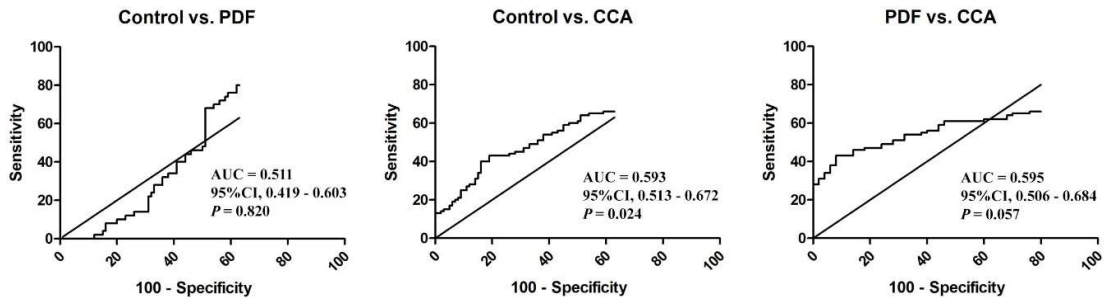

**Figure 3.** Receiver operating characteristic (ROC) curve analysis of the Hex5HexNAc4Fuc2NeuAc2 (5422) glycoform in the sera of control ( $n = 100$ ), PDF ( $n = 50$ ), and CCA ( $n = 100$ ) subjects. The ROC curves of the 5422 glycoform of subjects with PDF and CCA compared with the control group are represented in (A) and (B), respectively. ROC curves of patients with PDF and CCA (C) are constructed. Area under the ROC curve (AUC) and statistic comparisons are indicated.

### 6502 glycoform

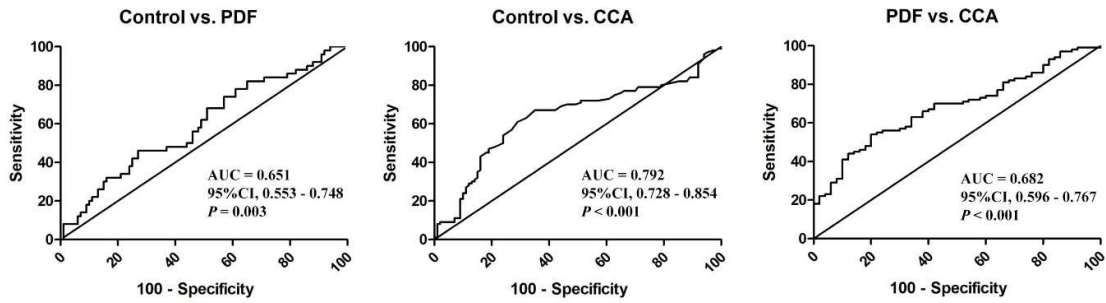

**Figure S4.** Receiver operating characteristic (ROC) curve analysis of the Hex6HexNAc5NeuAc2 (6502) glycoform in the sera of control ( $n = 100$ ), PDF ( $n = 50$ ), and CCA ( $n = 100$ ) subjects. The ROC curves of the 6502 glycoform of subjects with PDF and CCA compared with the control group are represented in (A) and (B), respectively. ROC curves of patients with PDF and CCA (C) are constructed. Area under the ROC curve (AUC) and statistic comparisons are indicated.

### 6511 glycoform

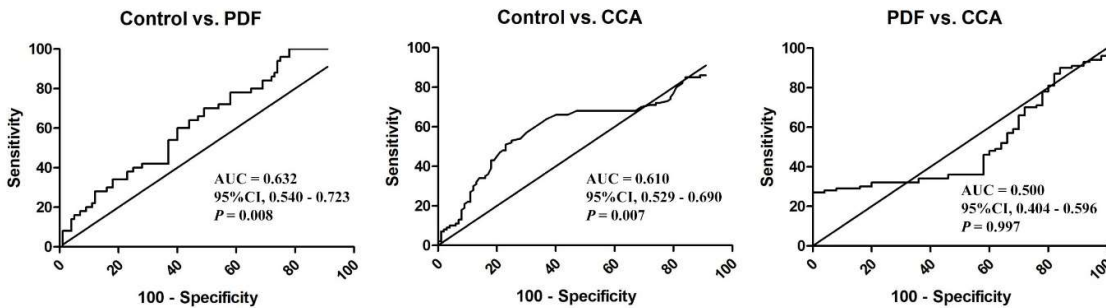

**Figure 5.** Receiver operating characteristic (ROC) curve analysis of the Hex6HexNAc5Fuc1NeuAc1 (6511) glycoform in the sera of control ( $n = 100$ ), PDF ( $n = 50$ ), and CCA ( $n = 100$ ) subjects. The ROC curves of the 6511 glycoform of subjects with PDF and CCA compared with the control group are represented in (A) and (B), respectively. ROC curves of patients with PDF and CCA (C) are constructed. Area under the ROC curve (AUC) and statistic comparisons are indicated.

### 6521 glycoform

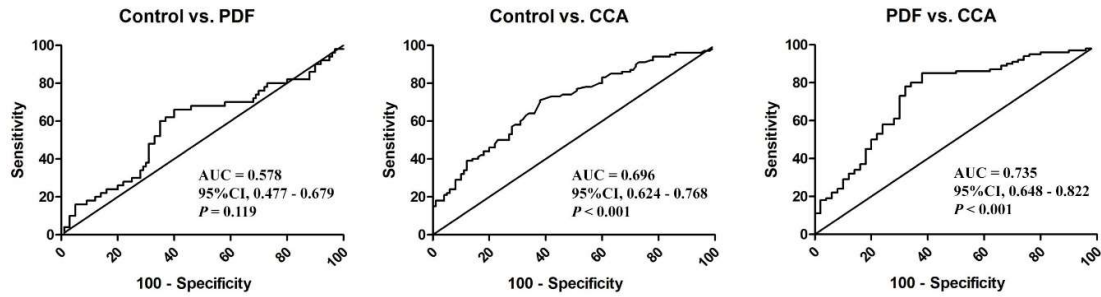

**Figure S6.** Receiver operating characteristic (ROC) curves analysis of the Hex6HexNAc5Fuc2NeuAc1 (6521) glycoform in the serum of control ( $n = 100$ ), PDF ( $n = 50$ ), and CCA ( $n = 100$ ) subjects. The ROC curves of the 6521 glycoform in the sera of subjects with PDF and CCA compared with the control group are represented in (A) and (B), respectively. ROC curves of patients with PDF and CCA (C) are constructed. The area under the ROC curve (AUC) and statistic comparisons are indicated.

### 5402 glycoform

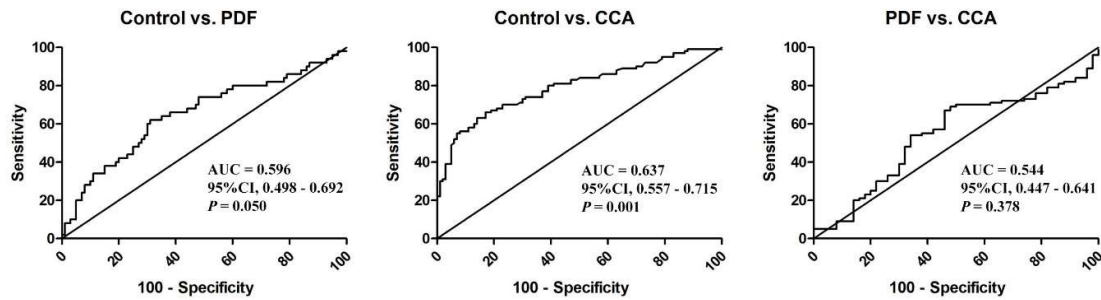

**Figure 7.** Receiver operating characteristic (ROC) curve analysis of the Hex5HexNAc4NeuAc2 (5402) glycoform in the sera of control ( $n = 100$ ), PDF ( $n = 50$ ), and CCA ( $n = 100$ ) subjects. The ROC curves of the 5402 glycoform in subjects with PDF and CCA compared with the control group are represented in (A) and (B), respectively. ROC curves of patients with PDF and CCA (C) are constructed. Area under the ROC curve (AUC) and statistic comparisons are indicated.

### 5412 glycoform

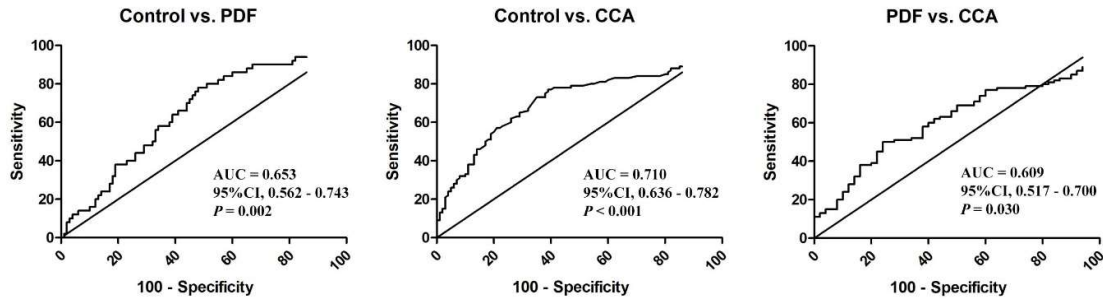

**Figure 8.** Receiver operating characteristic (ROC) curve analysis of the Hex5HexNAc4Fuc1NeuAc2 (5412) glycoform in the sera of control ( $n = 100$ ), PDF ( $n = 50$ ), and CCA ( $n = 100$ ) subjects. The ROC curves of the glycoform of subjects with PDF and CCA compared with the control group are represented in (A) and (B), respectively. ROC curves of patients with PDF and CCA (C) are constructed. The area under the ROC curve (AUC) and statistic comparisons are indicated.

### 5421 glycoform

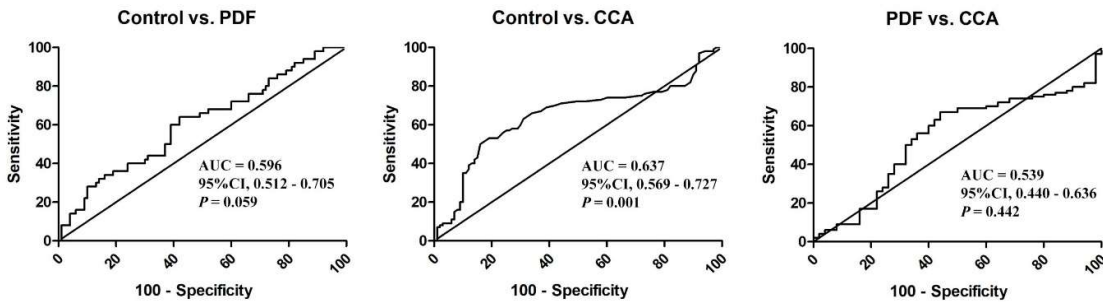

**Figure 9.** Receiver operating characteristic (ROC) curve analysis of the Hex5HexNAc4Fuc2NeuAc1 (5421) glycoform in the sera of control ( $n = 100$ ), PDF ( $n = 50$ ), and CCA ( $n = 100$ ) subjects. The ROC curves of the 5421 glycoform of subjects with PDF and CCA compared with the control group are represented in (A) and (B), respectively. ROC curves of patients with PDF and CCA (C) are constructed. Area under the ROC curve (AUC) and statistic comparisons are indicated.

## 6501 glycoform

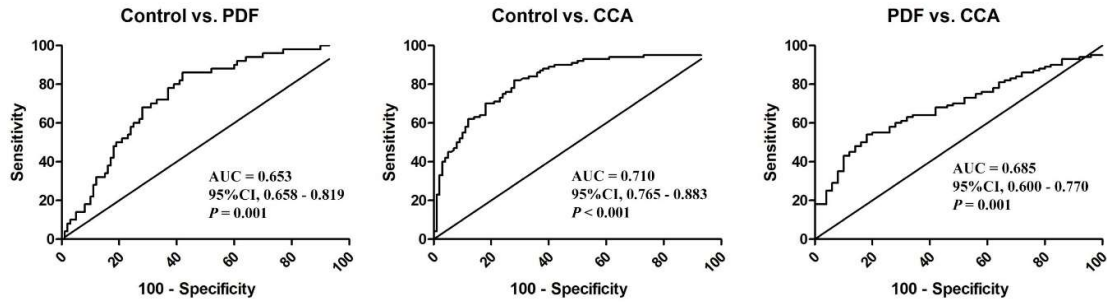

**Figure S10.** Receiver operating characteristic (ROC) curve analysis of the Hex6HexNAc5NeuAc1 (6501) glycoform in the sera of control ( $n = 100$ ), PDF ( $n = 50$ ), and CCA ( $n = 100$ ) subjects. The ROC curves of the 6501 glycoform of subjects with PDF and CCA compared with the control group are represented in (A) and (B), respectively. ROC curves of patients with PDF and CCA (C) are constructed. Area under the ROC curve (AUC) and statistic comparisons are indicated.
